# Supplementary material for: Bifunctional immune checkpoint-targeted antibody-ligand traps that simultaneously disable TGFβ enhance the efficacy of cancer immunotherapy
Source: PubMed Central journal article supplement (PMC5821872; doi:10.1038/s41467-017-02696-6), 2018-02-21
Supplement: 41467_2017_2696_MOESM1_ESM.pdf [file 41467_2017_2696_MOESM1_ESM.pdf]

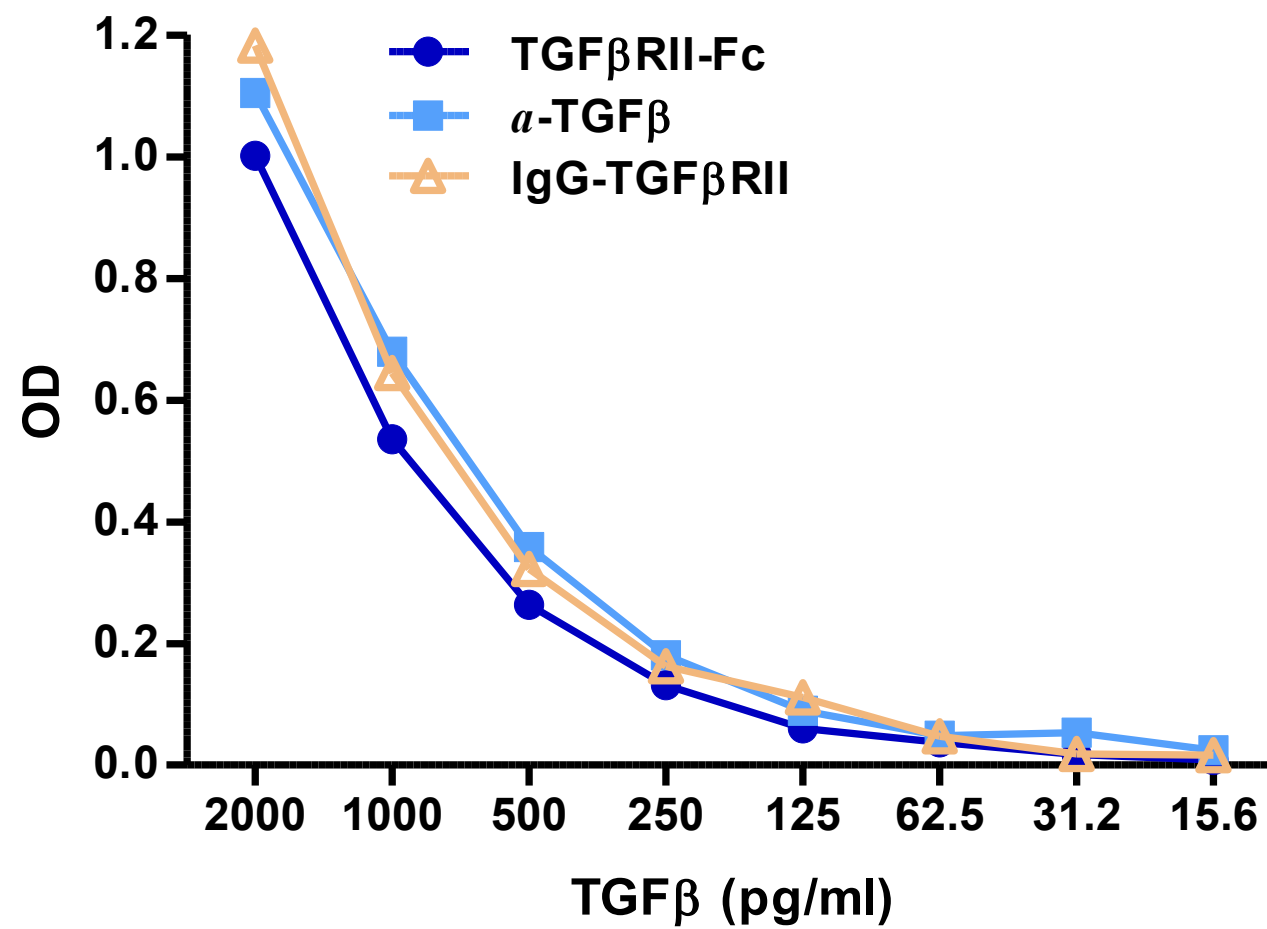

**Supplementary Figure 1. Comparative ability of  $\alpha$ -TGF $\beta$  and IgG-TGF $\beta$ RII to bind TGF $\beta$  *in vitro*.** Standard ELISA assay was performed to evaluate the comparative ability of  $\alpha$ -TGF $\beta$  Ab (1D11) and IgG-TGF $\beta$ RII to bind TGF $\beta$  *in vitro*. rhTGF $\beta$ 1 (0-2000 pg/ml) was added to the plates coated with either TGF $\beta$ RII-Fc, IgG-TGF $\beta$ RII or  $\alpha$ -TGF $\beta$  and binding to TGF $\beta$  was detected by a biotinylated anti-human TGF $\beta$ 1 antibody. TGF $\beta$ RII-Fc coated plates were used as a TGF $\beta$ -binding positive control. The data shows optical density (OD) values (mean of three replicate wells for each assay condition) from a representative of three independent experiments.

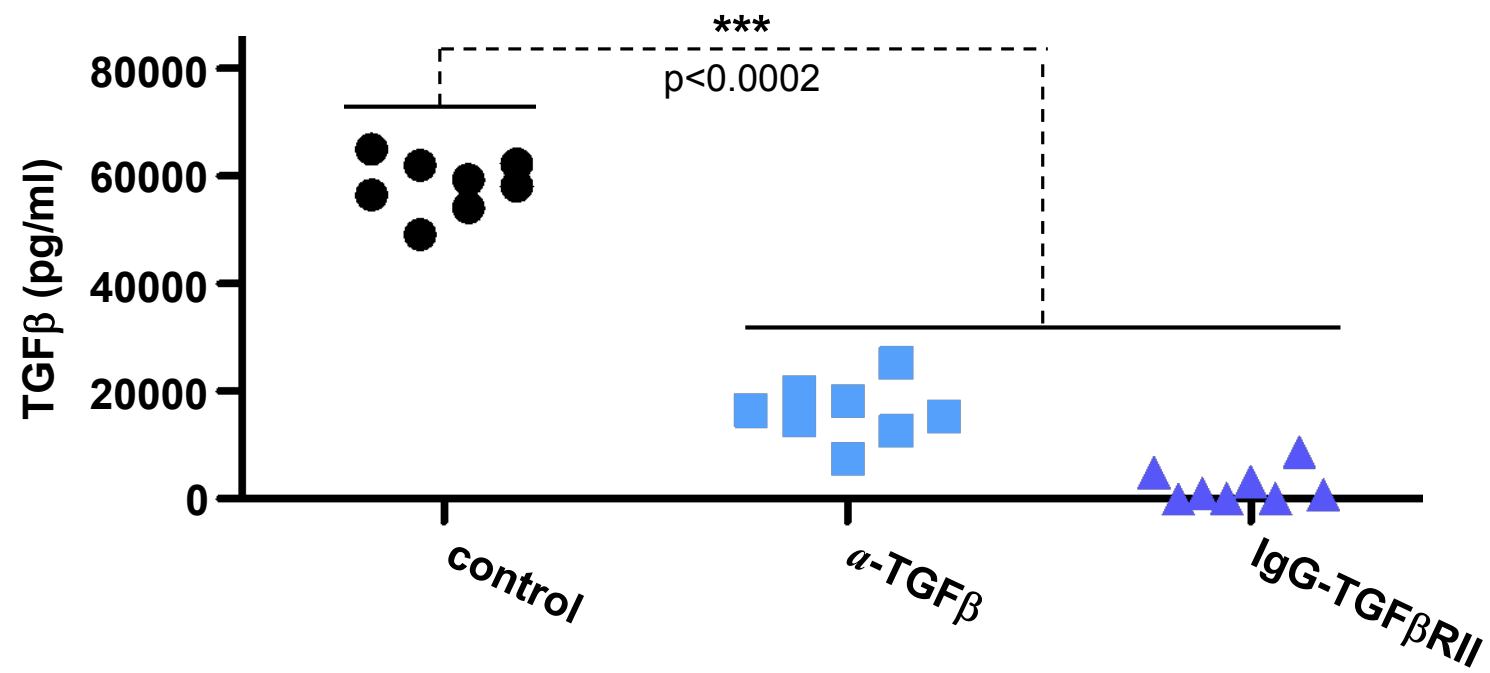

**Supplementary Figure 2. Sequestration of serum TGFβ by α-TGFβ and IgG-TGFβRII.** To demonstrate that both agents were administered at doses sufficient to saturate TGFβ *in vivo*, the sequestration of serum TGFβ was assessed in A375 tumor bearing mice treated with either α-TGFβ and IgG-TGFβRII at the dose used in all our *in vivo* studies (5mg/kg/week). Serum TGFβ levels in untreated tumor-bearing mice was significantly higher than that detected in cohorts treated with each antibody (p<0.0002).

# Uncropped scans - Figure 2c

---

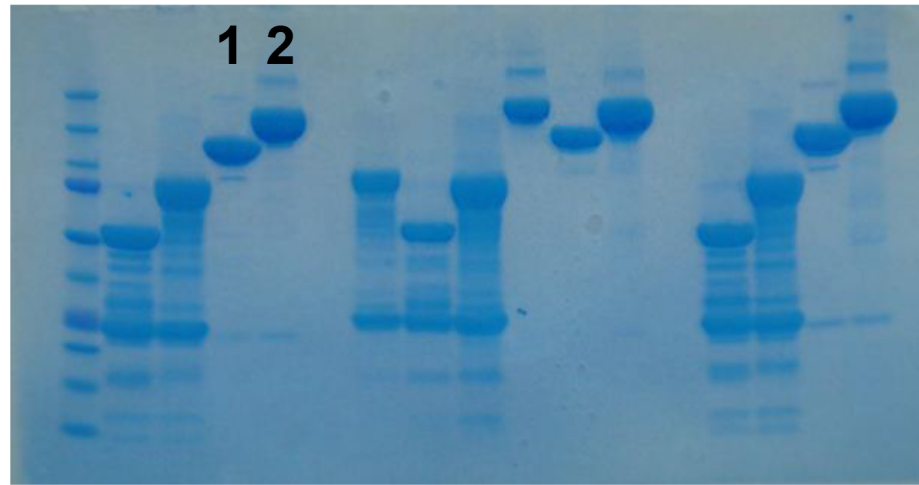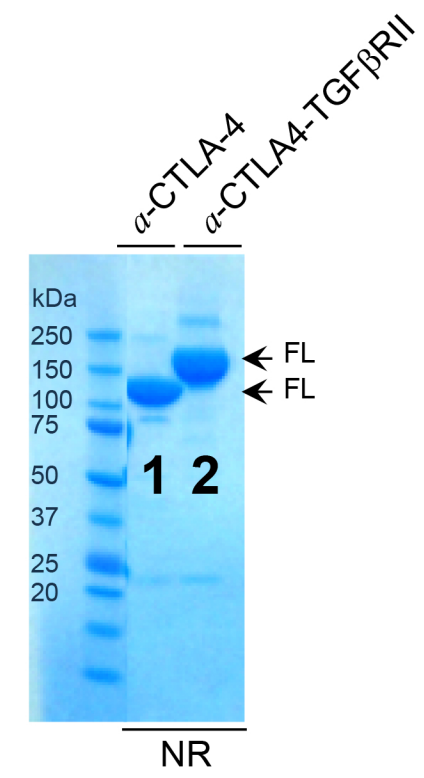

Supplementary Figure 3.

# Uncropped scans - Figure 3a

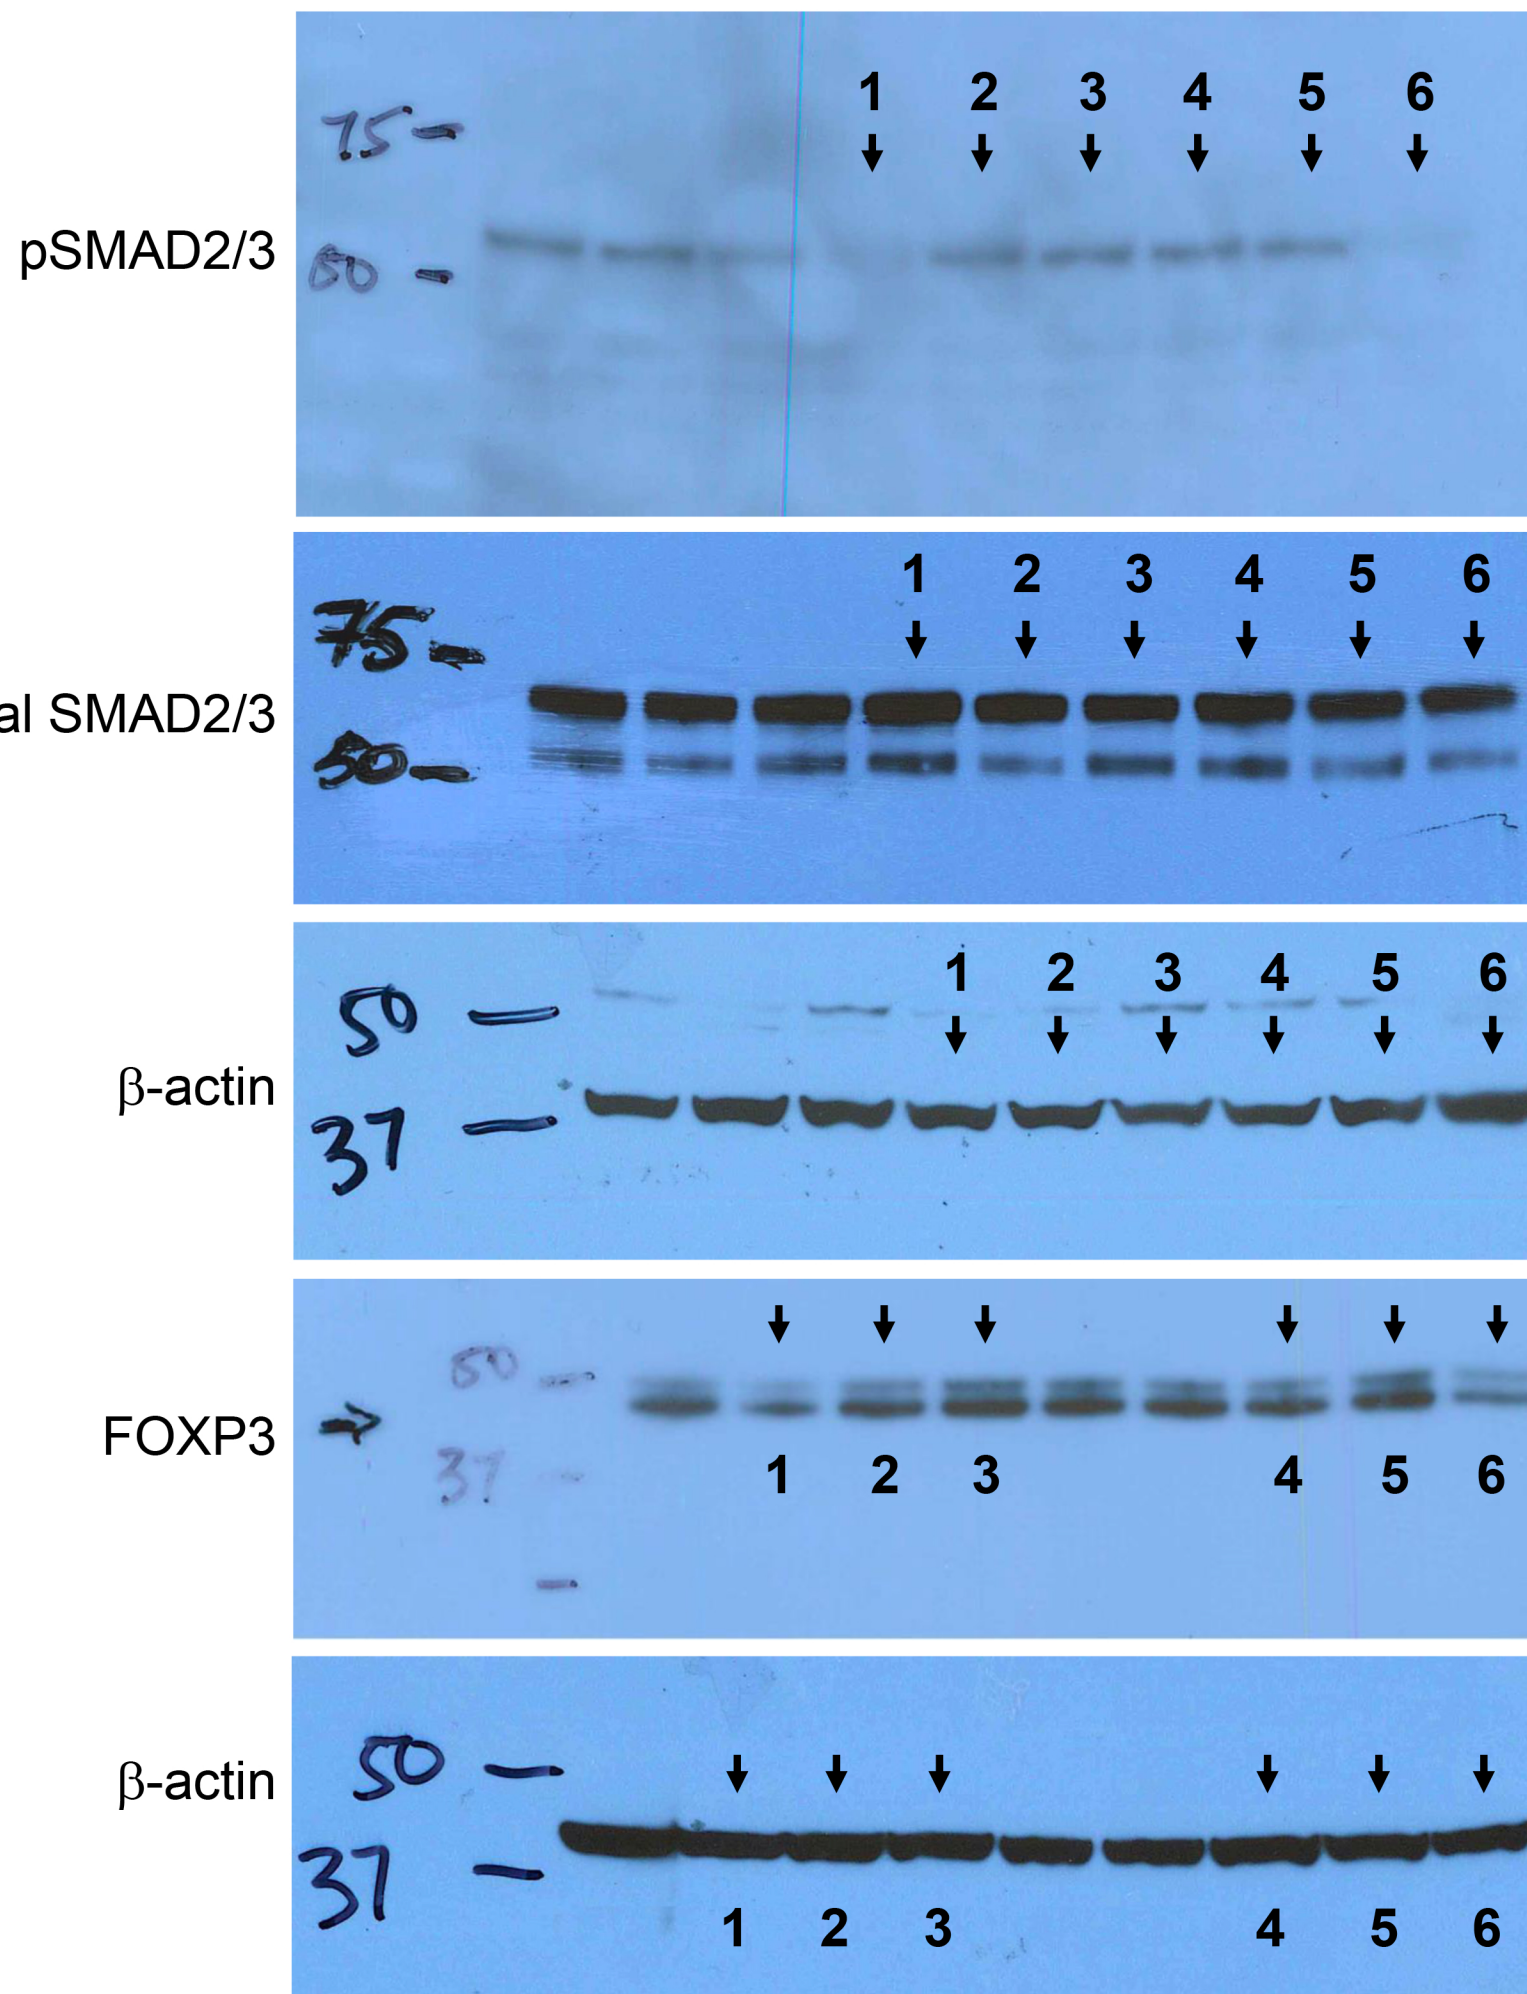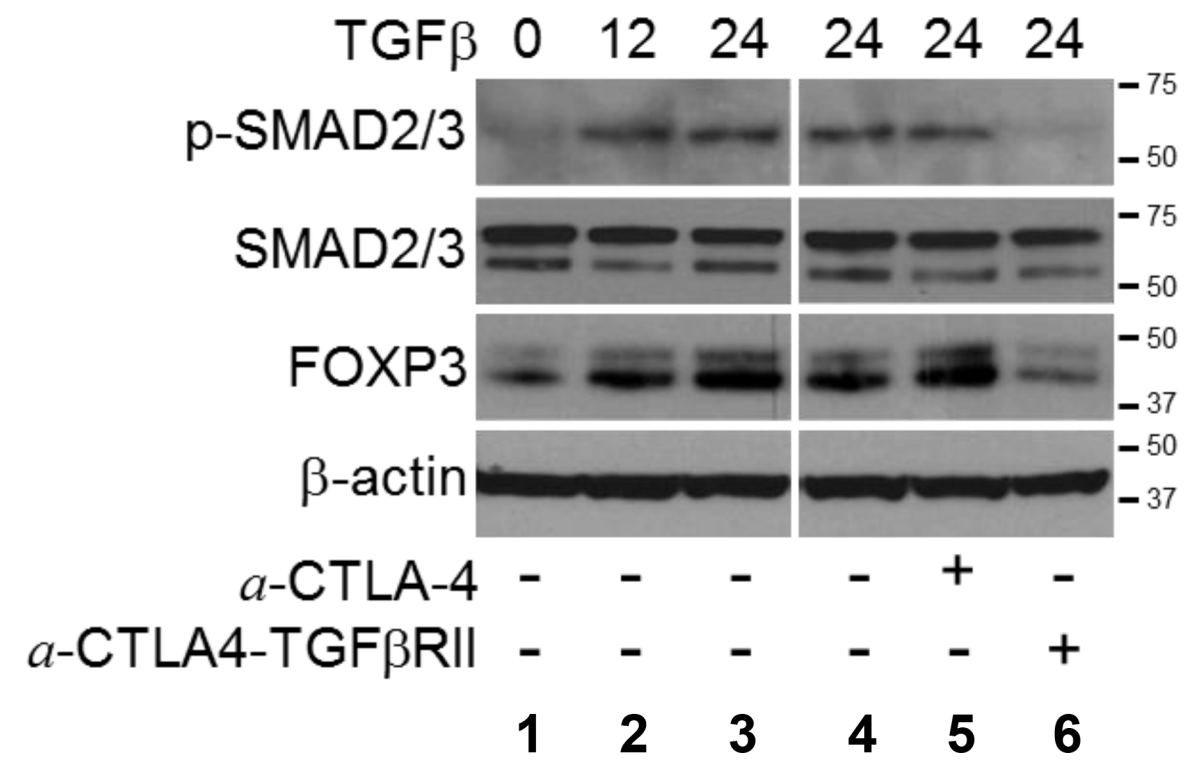

\* This β-actin was used in Figure 3a

Supplementary Figure 4.



# Uncropped scans - Figure 6b

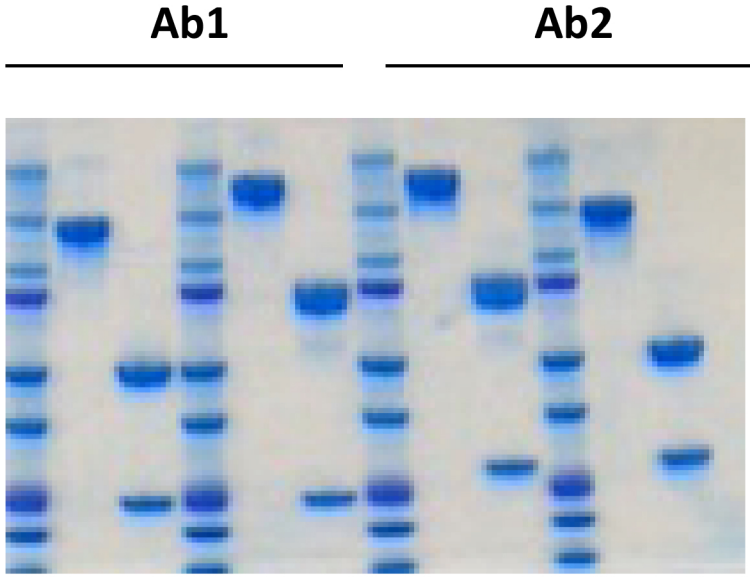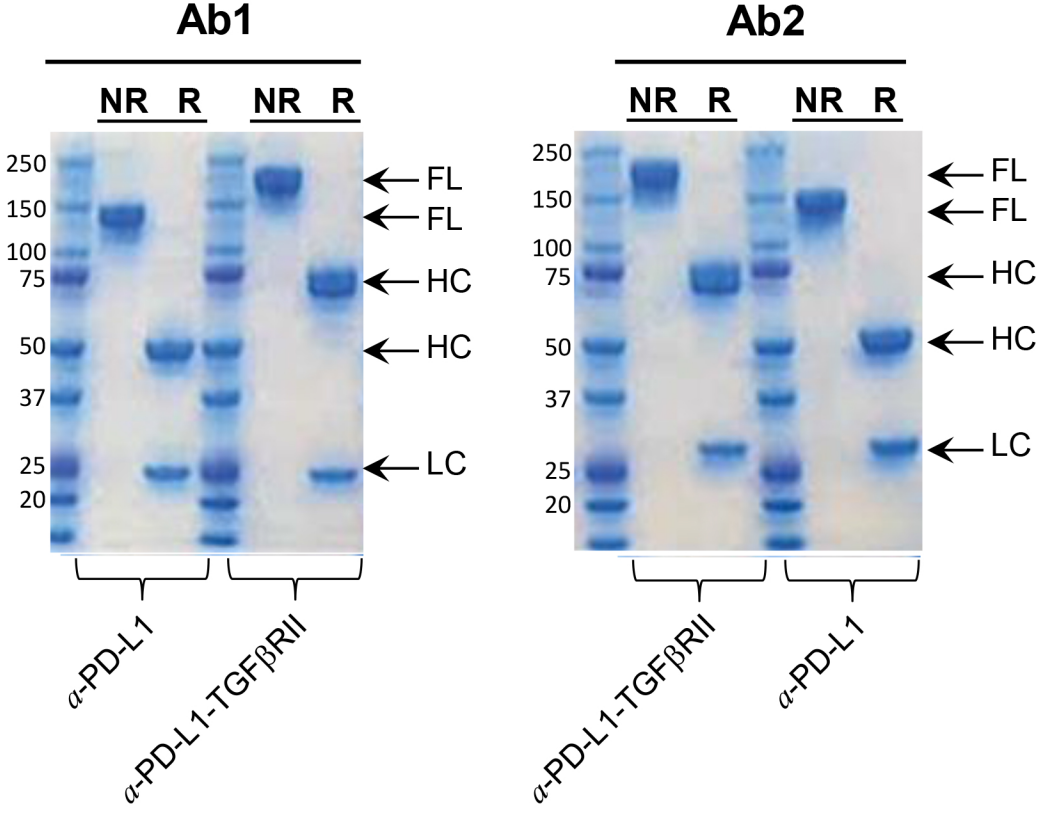

Supplementary Figure 5.

## Supplementary Note 1

### Amino acid sequences of all fusion antibodies used in this study

#### Anti-CTLA4-TGF $\beta$ RII (Ipilimumab-TGF $\beta$ RII)

##### *Heavy chain*

QVQLVESGGGVVQPGRSLRLSCAASGFTFSSYTMHWVRQAPGKGLEWVTFISYDGNKYYADSVKGRFTISRDN  
NSKNTLYLQMNSLRAEDTAIYYCARTGWLGPFDYWGQGTLLVTVSSASTKGPSVFPLAPSSKSTSGGTAALGCLV  
KDYFPEPVTVSWNSGALTSGVHTFPAVLQSSGLYSLSSVTVPSSSLGTQTYICNVNHKPSNTKVDKRVEPKSCD  
KTHTCPPCPAPELLGGPSVFLFPPKPKDTLMISRTPEVTCVVVDVSHEDPEVKFNWYVDGVEVHNAKTKPREEQ  
YNSTYRVVSVLTVLHQDWLNGKEYKCKVSNKALPAPIEKTISKAKGQPREPQVYTLPPSRDELTKNQVSLTCLV  
KGFYPSDIAVEWESNGQPENNYKTTTPVLDSDGSFFLYSKLTVDKSRWQQGNVFCFSVMHEALHNHYTQKSLSL  
SPGKGGGGSGGGGSGGGGSTIPPHVQKSVNNDMIVTDNNGAVKFPQLCKFCDFRSTCDNQKSCMSNCSITSICE  
KPQEVCAVWRKNDENITLETVCHDPKLPYHDFILEDAAAPKCMKEKKKPGETFFMCSCSSDECNDNIIFSEY  
NTSNPD

##### *Light chain*

EIVLTQSPGTLSPGERATLSCRASQSVGSSYLAWYQQKPGQAPRLLIYGAFSRATGIPDRFSGSGSGTDFTLTIS  
RLEPEDFAVYYCQQYGGSPWTFGQGTKVEIKRTVAAPSVFIFPPSDEQLKSGTASVVCLLNNFYPREAKVQWKV  
DNALQSGNSQESVTEQDSKDYSLSTLTLKADYEKHKVYACEVTHQGLSSPVTKSFNRGEC

#### Anti-PDL1-TGF $\beta$ RII (Atezolizumab-TGF $\beta$ RII)

##### *Heavy chain*

EVQLVESGGGLVQPGGSLRLSCAASGFTFSDSWIHWRQAPGKGLEWVAWISPYGGSTYYADSVKGRFTISADT  
SKNTAYLQMNSLRAEDTAVYYCARRHWPGGFDYWGQGTLLVTVSAASTKGPSVFPLAPSSKSTSGGTAALGCLV  
KDYFPEPVTVSWNSGALTSGVHTFPAVLQSSGLYSLSSVTVPSSSLGTQTYICNVNHKPSNTKVDKVEPKSCD  
KTHTCPPCPAPELLGGPSVFLFPPKPKDTLMISRTPEVTCVVVDVSHEDPEVKFNWYVDGVEVHNAKTKPREEQ  
YASTYRVVSVLTVLHQDWLNGKEYKCKVSNKALPAPIEKTISKAKGQPREPQVYTLPPSREEMTKNQVSLTCLV  
KGFYPSDIAVEWESNGQPENNYKTTTPVLDSDGSFFLYSKLTVDKSRWQQGNVFCFSVMHEALHNHYTQKSLSL  
SPGKGGGGSGGGGSGGGGSTIPPHVQKSVNNDMIVTDNNGAVKFPQLCKFCDFRSTCDNQKSCMSNCSITSICE  
KPQEVCAVWRKNDENITLETVCHDPKLPYHDFILEDAAAPKCMKEKKKPGETFFMCSCSSDECNDNIIFSEY  
NTSNPD

##### *Light chain*

DIQMTQSPSSLSASVGRVITTCRASQDVSTAVAWYQQKPGKAPKLLIYSASFLYSGVPSRFRSGSGSGTDFTLTIS  
LQPEDFATYYCQQYLYHPATFGQGTKVEIKRTVAAPSVFIFPPSDEQLKSGTASVVCLLNNFYPREAKVQWKVD  
NALQSGNSQESVTEQDSKDYSLSTLTLKADYEKHKVYACEVTHQGLSSPVTKSFNRGEC

#### Anti-PDL1-TGF $\beta$ RII (Avelumab-TGF $\beta$ RII)

##### *Heavy chain*

EVQLLESGGGLVQPGGSLRLSCAASGFTFSSYIMMWVRQAPGKGLEWVSSIYPSGGITFYADTVKGRFTISRDN  
KNTLYLQMNSLRAEDTAVYYCARIKLGTVTTVDYWGQGTLLVTVSSASTKGPSVFPLAPSSKSTSGGTAALGCLV  
KDYFPEPVTVSWNSGALTSGVHTFPAVLQSSGLYSLSSVTVPSSSLGTQTYICNVNHKPSNTKVDKRVEPKSCD  
KTHTCPPCPAPELLGGPSVFLFPPKPKDTLMISRTPEVTCVVVDVSHEDPEVKFNWYVDGVEVHNAKTKPREEQ  
YNSTYRVVSVLTVLHQDWLNGKEYKCKVSNKALPAPIEKTISKAKGQPREPQVYTLPPSREEMTKNQVSLTCLV  
KGFYPSDIAVEWESNGQPENNYKTTTPVLDSDGSFFLYSKLTVDKSRWQQGNVFCFSVMHEALHNHYTQKSLSL  
SPGKGGGGSGGGGSGGGGSTIPPHVQKSVNNDMIVTDNNGAVKFPQLCKFCDFRSTCDNQKSCMSNCSITSICE  
KPQEVCAVWRKNDENITLETVCHDPKLPYHDFILEDAAAPKCMKEKKKPGETFFMCSCSSDECNDNIIFSEY  
NTSNPD

##### *Light chain*

QSALTQPASVSGSPGQSITISCTGTSSDVGGYNYVSWYQQHPGKAPKLMYDVSNRPSGVSNRFSGSKSGNTASL  
TISGLQAEDEADYYCSSYTSSTRVFGTGTGKVTVLGQPKANPTVTLFPPSSEELQANKATLVCLISDFYPGAVTVA  
WKADGSPVKAGVETTKPSKQSNKYAASSYLSLTPEQWKSRSYSCQVTHEGSTVEKTVAPTECS

**Anti-gp120-TGFβRII (B12-TGFβRII) – control antibody**

*Heavy chain*

QVQLVQSGAEVKKPGASVKVSCQASGYRFSNFVIHWVRQAPGQRFWGMWINPYNGNKEFSAKFQDRVTF  
DTSANTAYMELRSLRSADTAVYYCARVGPYSWDDSPQDNYYMDVWGKGTTVIVSSASTKGPSVFPLAPSSKST  
SGGTAALGCLVKDYFPEPVTVSWNSGALTSGVHTFPAVLQSSGLYSLSSVVTVPSSSLGTQTYICNVNHKPSNTK  
VDKRVEPKSCDKTHTCPPCPAPELLGGPSVFLFPPKPKDTLMISRTPEVTCVVDVSHEDPEVKFNWYVDGVEV  
HNAKTKPREEQYNSTYRVVSVLTVLHQDWLNGKEYKCKVSNKALPAPIEKTISKAKGQPREPQVYTLPPSREEM  
TKNQVSLTCLVKGFYSDIAVEWESNGQPENNYKTPPVLDSDGSFFLYSKLTVDKSRWQQGNVFNCSVMHEAL  
HNHYTQKLSLSLSPGKGGGGSGGGGSGGGGSTIPPHVQKSVNNDMIVTDNNGAVKFPQLCKFCDVRFSTCDNQK  
SCMSNCSITSICEKPQEVCAVWRKNDENITLETVCHDPKLPYHDFILEDAAAPKCMKEKKKPGETFFMCSCSSD  
ECNDNIIFSEEYNTSNPD

*Light chain*

EIVLTQSPGTLSPGERATFSCRSSHSIRSRVAVWYQHKGQAPRLVIHGVSNRASGISDRFSGSGSGTDFTLTITR  
VEPEDFALYYCQVYGASSYTFGQGTKLERKRTVAAPSVFIFPPSDEQLKSGTASVVCLLNNFYPREAKVQWKVD  
NALQSGNSQESVTEQDSKDYSLSTLTLSKADYEKHKVYACEVTHQGLSSPVTKSFNRGEC
